# Supplementary material for: Supramolecular heptanuclear Ln–Cu complexes involving nitronyl nitroxide biradicals: structure and magnetic behavior
Source: Royal Society of Chemistry journal article supplement (doi:10.1039/d2dt00220e), 2022-01-01
Supplement: d2dt00220e1.pdf [file d2dt00220e1.pdf]

## Supporting Information

### Supramolecular heptanuclear Ln-Cu complexes involving nitronyl nitroxide biradicals: structure and magnetic behavior

Lu Xi,<sup>a</sup> Chao-Yi Jin,<sup>a</sup> Hong-Wei Song,<sup>a</sup> Xiao-Tong Wang,<sup>a</sup> Li-Cun Li<sup>\*a</sup> and Jean-Pascal Sutter<sup>\*b</sup>

<sup>a</sup> Department of Chemistry, Key Laboratory of Advanced Energy Materials Chemistry, College of Chemistry, Nankai University, Tianjin 300071, China

<sup>b</sup> Laboratoire de Chimie de Coordination du CNRS (LCC-CNRS), Université de Toulouse, CNRS, Toulouse, France

\* Corresponding author. E-mail address:

[llicun@nankai.edu.cn](mailto:llicun@nankai.edu.cn)

[jean-pascal.sutter@lcc-toulouse.fr](mailto:jean-pascal.sutter@lcc-toulouse.fr)

#### Contents

|                                                                                                                                                       |   |
|-------------------------------------------------------------------------------------------------------------------------------------------------------|---|
| <b>Table S1.</b> Selected bond distances (Å) and angles (°) for complex 1 .....                                                                       | 3 |
| <b>Table S2.</b> Selected bond distances (Å) and angles (°) for complex 2 .....                                                                       | 3 |
| <b>Table S3.</b> Selected bond distances (Å) and angles (°) for complex 3 .....                                                                       | 4 |
| <b>Table S4.</b> Selected bond distances (Å) and angles (°) for complex 4 .....                                                                       | 4 |
| <b>Table S5.</b> Accurate geometry analysis by SHAPE 2.0 software .....                                                                               | 5 |
| <b>Table S6.</b> Selected magnetic parameters for related nitronyl nitroxide-Dy complexes                                                             | 5 |
| <b>Figure S1.</b> The Powder X-ray diffraction (PXRD) patterns for complexes 1–4 at room temperature.....                                             | 6 |
| <b>Figure S2.</b> X-ray crystal structure of complexes 1-4 with thermal ellipsoids drawn at the 30 % probability level. ....                          | 6 |
| <b>Figure S3.</b> Schematic of short distances between the uncoordinated NO groups and the bridging sp <sup>2</sup> carbon atoms of the radicals..... | 7 |

**Figure S4.** Packing arrangement for complexes **1**, **2**, and **4**. Fluorine and hydrogen atoms are omitted for the sake of clarity .....8

**Figure S5.** Field dependences of magnetization and plots of the reduced magnetization  $M$  vs.  $H/T$  in the field range 0–70 kOe and at the temperature range of 1.9–5.0 K for complexes **2-4**.....9

**Figure S6.** Temperature dependence of the in-phase and out-of-phase ac susceptibilities under zero dc field for complex **3**.....9

**Figure S7.** Field dependence of the out-of-phase ac susceptibilities for **3** under 2 K and a frequency of 997 Hz. ....9

**Figure S8.** Temperature dependence of the in-phase and out-of-phase ac susceptibilities under zero dc field and 1000Oe dc field for complexes **2** and **4**. .....10

**Table S1.** Selected bond distances (Å) and angles (°) for complex **1**.

| <b>1 YCu</b> |           |             |           |
|--------------|-----------|-------------|-----------|
| Y1-O4        | 2.353(7)  | Y2-O23      | 2.368(7)  |
| Y1-O2        | 2.362(7)  | Y2-O18      | 2.336(7)  |
| Y1-O9        | 2.383(8)  | Y2-O16      | 2.353(7)  |
| Y1-O6        | 2.296(8)  | Y2-O17      | 2.348(7)  |
| Y1-O3        | 2.344(7)  | Y2-O22      | 2.376(8)  |
| Y1-O5        | 2.374(7)  | Y2-O20      | 2.303(8)  |
| Y1-O7        | 2.296(8)  | Y2-O21      | 2.295(8)  |
| Y1-O8        | 2.346(9)  | Y2-O19      | 2.357(8)  |
| Cu1-O12      | 1.945(7)  | Cu2-N14     | 1.980(8)  |
| Cu1-O14      | 1.939(7)  | Cu2-O26     | 2.060(7)  |
| Cu1-O11      | 1.930(7)  | Cu2-O25     | 2.198(7)  |
| Cu1-O13      | 2.197(8)  | Cu1-N7      | 1.979(8)  |
| N2-O2        | 1.287(10) | N9-O16      | 1.304(10) |
| N3-O9        | 1.334(10) | N10-O23     | 1.319(10) |
| O2-Y1-O9     | 84.0(2)   | O16-Y2-O23  | 86.6(2)   |
| O12-Cu1-O13  | 89.6(3)   | O26-Cu2-O25 | 87.3(3)   |
| N2-O2-Y1     | 139.6(6)  | N9-O16-Y2   | 140.1(6)  |
| N3-O9-Y1     | 139.6(6)  | N10-O23-Y2  | 136.7(6)  |

**Table S2.** Selected bond distances (Å) and angles (°) for complex **2**.

| <b>2 TbCu</b> |           |             |           |
|---------------|-----------|-------------|-----------|
| Tb1-O4        | 2.383(6)  | Tb2-O23     | 2.393(6)  |
| Tb1-O2        | 2.378(6)  | Tb2-O18     | 2.359(7)  |
| Tb1-O9        | 2.415(7)  | Tb2-O16     | 2.362(7)  |
| Tb1-O6        | 2.339(7)  | Tb2-O17     | 2.371(6)  |
| Tb1-O3        | 2.352(6)  | Tb2-O22     | 2.390(7)  |
| Tb1-O5        | 2.403(7)  | Tb2-O20     | 2.340(7)  |
| Tb1-O7        | 2.336(7)  | Tb2-O21     | 2.327(7)  |
| Tb1-O8        | 2.359(7)  | Tb2-O19     | 2.355(7)  |
| Cu1-O12       | 1.954(6)  | Cu2-N14     | 1.974(7)  |
| Cu1-O14       | 1.940(6)  | Cu2-O26     | 2.072(7)  |
| Cu1-O11       | 1.938(7)  | Cu2-O25     | 2.198(7)  |
| Cu1-O13       | 2.208(7)  | Cu1-N7      | 1.971(7)  |
| N2-O2         | 1.310(10) | N9-O16      | 1.300(10) |
| N3-O9         | 1.301(10) | N10-O23     | 1.318(10) |
| O2-Tb1-O9     | 83.7(2)   | O16-Tb2-O23 | 46.18(8)  |

|             |          |             |          |
|-------------|----------|-------------|----------|
| O12-Cu1-O13 | 89.6(3)  | O26-Cu2-O25 | 87.3(3)  |
| N2-O2-Tb1   | 138.5(5) | N9-O16-Tb2  | 139.2(5) |
| N3-O9-Tb1   | 139.2(5) | N10-O23-Tb2 | 137.1(5) |

**Table S3.** Selected bond distances (Å) and angles (°) for complex **3**.

| <b>3 DyCu</b> |           |                 |           |
|---------------|-----------|-----------------|-----------|
| Dy1-O4        | 2.376(8)  | Dy2-O23         | 2.389(8)  |
| Dy1-O2        | 2.395(8)  | Dy2-O18         | 2.368(9)  |
| Dy1-O9        | 2.414(8)  | Dy2-O16         | 2.359(9)  |
| Dy1-O6        | 2.325(8)  | Dy2-O17         | 2.369(8)  |
| Dy1-O3        | 2.361(8)  | Dy2-O22         | 2.414(9)  |
| Dy1-O5        | 2.435(9)  | Dy2-O20         | 2.321(9)  |
| Dy1-O7        | 2.322(9)  | Dy2-O21         | 2.334(9)  |
| Dy1-O8        | 2.390(10) | Dy2-O19         | 2.391(8)  |
| Cu1-O12       | 1.972(9)  | Cu2-N14         | 1.990(9)  |
| Cu1-O14       | 1.955(8)  | Cu2-O26         | 2.083(9)  |
| Cu1-O11       | 1.936(9)  | Cu2-O25         | 2.201(9)  |
| Cu1-O13       | 2.219(9)  | Cu1-N7          | 1.988(9)  |
| N2-O2         | 1.298(12) | N9-O16          | 1.318(12) |
| N3-O9         | 1.290(12) | N10-O23         | 1.296(13) |
| O2-Dy1-O9     | 84.1(3)   | O16-Dy2-O23     | 86.7(3)   |
| O12-Cu1-O13   | 89.4(3)   | O26-Cu2-O25     | 87.7(3)   |
| N2-O2-Dy1     | 138.8(7)  | N9-O16-Dy2      | 140.9(7)  |
| N3-O9-Dy1     | 140.0(7)  | N10-O23-Dy2     | 138.0(7)  |
| Dy1-O2-N2-C7  | 65.4(15)  | Dy2-O16-N9-C54  | 62.0(17)  |
| Dy1-O9-N3-C35 | 60.8(16)  | Dy2-O23-N10-C82 | 57.0(17)  |

**Table S4.** Selected bond distances (Å) and angles (°) for complex **4**.

| <b>4 HoCu</b> |          |         |          |
|---------------|----------|---------|----------|
| Ho1-O2        | 2.349(7) | Ho2-O22 | 2.384(8) |
| Ho1-O5        | 2.279(9) | Ho2-O23 | 2.361(8) |
| Ho1-O4        | 2.358(7) | Ho2-O18 | 2.344(8) |
| Ho1-O3        | 2.325(8) | Ho2-O17 | 2.348(8) |
| Ho1-O9        | 2.389(8) | Ho2-O19 | 2.339(7) |
| Ho1-O7        | 2.383(8) | Ho2-O21 | 2.300(9) |
| Ho1-O8        | 2.266(8) | Ho2-O16 | 2.330(7) |
| Ho1-O6        | 2.339(9) | Ho2-O20 | 2.301(8) |
| Cu1-N7        | 1.971(9) | Cu2-N14 | 1.985(8) |
| Cu1-O12       | 1.965(8) | Cu2-O26 | 2.083(9) |

|             |           |             |           |
|-------------|-----------|-------------|-----------|
| Cu1-O11     | 1.916(9)  | Cu2-O25     | 2.170(9)  |
| Cu1-O13     | 2.196(9)  | Cu1-O14     | 1.943(8)  |
| N2-O2       | 1.309(11) | N9-O16      | 1.297(11) |
| N3-O9       | 1.292(11) | N10-O23     | 1.308(12) |
| O2-Ho1-O9   | 83.5(3)   | O16-Ho2-O23 | 86.6(3)   |
| O12-Cu1-O13 | 89.9(3)   | O26-Cu2-O25 | 87.0(3)   |
| N2-O2-Ho1   | 138.1(6)  | N9-O16-Ho2  | 140.2(6)  |
| N3-O9-Ho1   | 138.7(6)  | N10-O23-Ho2 | 136.9(6)  |

**Table S5.** Accurate geometry analysis by SHAPE 2.0 software.

| Complex      | TDD-8 | JBTPR-8 | BTPR-8       | Complex      | TDD-8 | JBTPR-8 | BTPR-8       |
|--------------|-------|---------|--------------|--------------|-------|---------|--------------|
| <b>1</b> Y1  | 1.347 | 1.662   | <b>0.853</b> | <b>1</b> Y2  | 2.007 | 1.591   | <b>0.783</b> |
| <b>2</b> Tb1 | 1.369 | 1.706   | <b>0.853</b> | <b>2</b> Tb2 | 2.007 | 1.652   | <b>0.738</b> |
| <b>3</b> Dy1 | 1.357 | 1.560   | <b>0.856</b> | <b>3</b> Dy2 | 1.976 | 1.549   | <b>0.775</b> |
| <b>4</b> Ho1 | 1.394 | 1.543   | <b>0.788</b> | <b>4</b> Ho2 | 1.889 | 1.581   | <b>0.738</b> |

**Table S6.** Selected magnetic parameters for four related Dy SMMs<sup>1-4</sup>.

| Complex                                                                                                                 | $U_{\text{eff}}$ | $H_{\text{dc}}(\text{Oe})$ | $\tau_0(\text{s})$      | Closest ideal geometry           | Ref.      |
|-------------------------------------------------------------------------------------------------------------------------|------------------|----------------------------|-------------------------|----------------------------------|-----------|
| [Dy(hfac) <sub>3</sub> (NITmbis)] <sub>2</sub>                                                                          | 11.6 ± 0.3 K     | 0                          | 2.3 × 10 <sup>-8</sup>  | C <sub>2v</sub>                  | 1         |
| [Dy(hfac) <sub>3</sub> Cu(hfac) <sub>2</sub> (bisNITPhPyrim)]                                                           | 8.13 K           | 500                        | 1.07 × 10 <sup>-8</sup> | C <sub>2v</sub> ~D <sub>2d</sub> | 4         |
| [DyNi(hfac) <sub>5</sub> (NITPh-PyPzbis)]                                                                               | 23.3 K           | 2000                       | 6.33 × 10 <sup>-7</sup> | C <sub>2v</sub>                  | 2         |
| [DyMn(hfac) <sub>5</sub> (NITPh-PyPzbis)]                                                                               | -                | -                          | -                       | D <sub>2d</sub>                  | 2         |
| [DyCo(hfac) <sub>5</sub> (NITPh-PyPzbis)]·CH <sub>2</sub> Cl <sub>2</sub>                                               | 14.91 K          | 2500                       | 6.80 × 10 <sup>-8</sup> | C <sub>2v</sub>                  | 3         |
| [Dy <sub>2</sub> Cu(hfac) <sub>8</sub> Cu(NITPhTzbis) <sub>2</sub> ][DyCu(hfac) <sub>5</sub> (NITPhTzbis)] <sub>2</sub> | 10.8 K           | 400                        | 6.3 × 10 <sup>-7</sup>  | C <sub>2v</sub>                  | This work |

NITmbis = 1,3-bis-(1'-oxyl-3'-oxido-4',4',5',5'-tetramethyl-4,5-hydro-1H-imidazol-2-yl)benzene ; bisNITPhPyrim = [5-(5-pyrimidyl)-1,3-bis(1'-oxyl-3'-oxido-4',4',5',5'-tetramethyl-4,5-hydro-1H-imidazol-2-yl)]benzene ; NITPh-PyPzbis = 5-(3-(2-pyridinyl)-1H-pyrazol-1-yl)-1,3-bis(1'-oxyl-3'-oxido-4',4',5',5'-tetramethyl-4,5-hydro-1H-imidazol-2-yl)benzene ; NITPh-PyPzbis = 5-(3-(2-pyridinyl)-1H-pyrazol-1-yl)-1,3-bis(1'-oxyl-3'-oxido-4',4',5',5'-tetramethyl-4,5-hydro-1H-imidazol-2-yl)benzene ; NITPh-Tzbis = 5-(1,2,4-triazolyl)-1,3-bis(1'-oxyl-3'-oxido-4',4',5',5'-tetramethyl-4,5-hydro-1H-imidazol-2-yl)benzene.

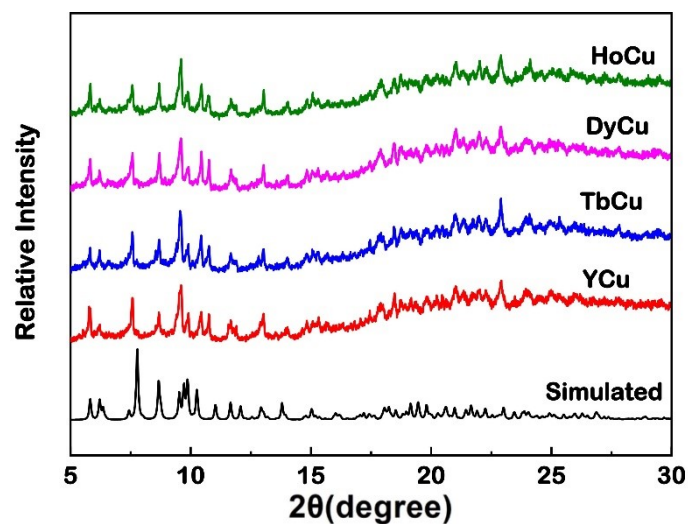

**Figure S1.** The Powder X-ray diffraction (PXRD) patterns for complexes 1–4 at room temperature.

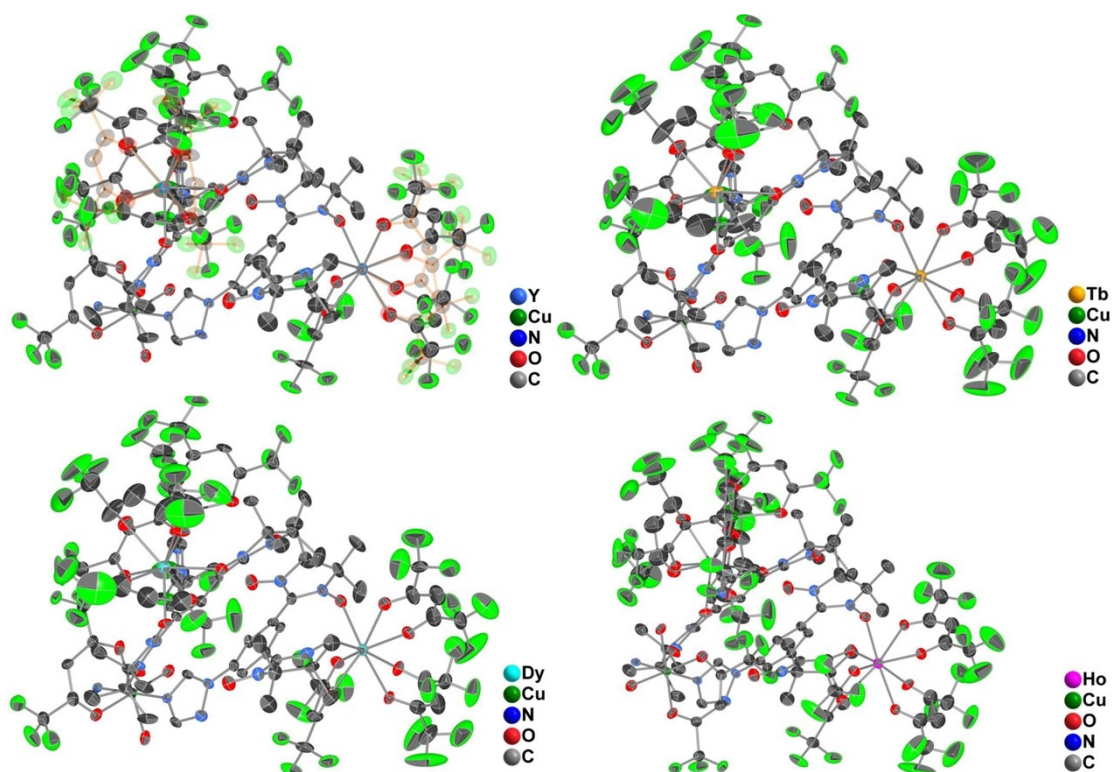

1. **Figure S2.** X-ray crystal structure of complexes 1-4 with thermal ellipsoids drawn at the 30 % probability level.(The atoms contained in the disordered components of the YCu structure are shown with 80% transparency and linked by orange bonds.)

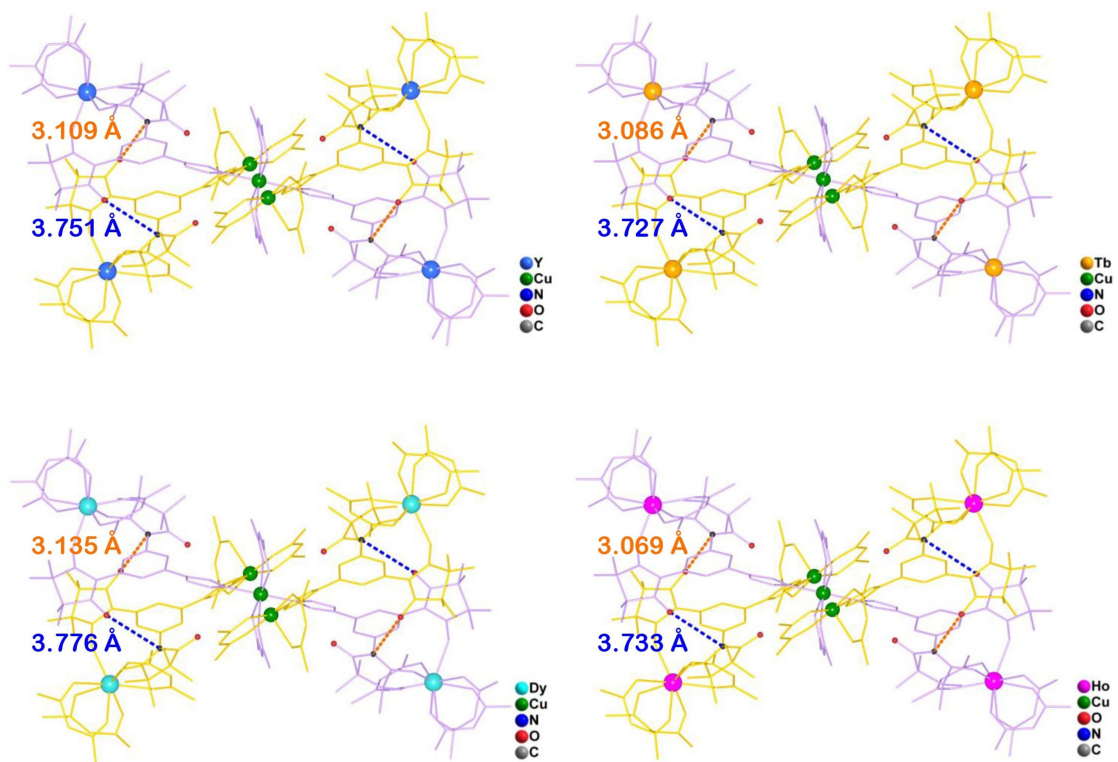

**Figure S3.** Schematic of short distances between the uncoordinated NO groups and the bridging  $sp^2$  carbon atoms of the radicals in all complexes.

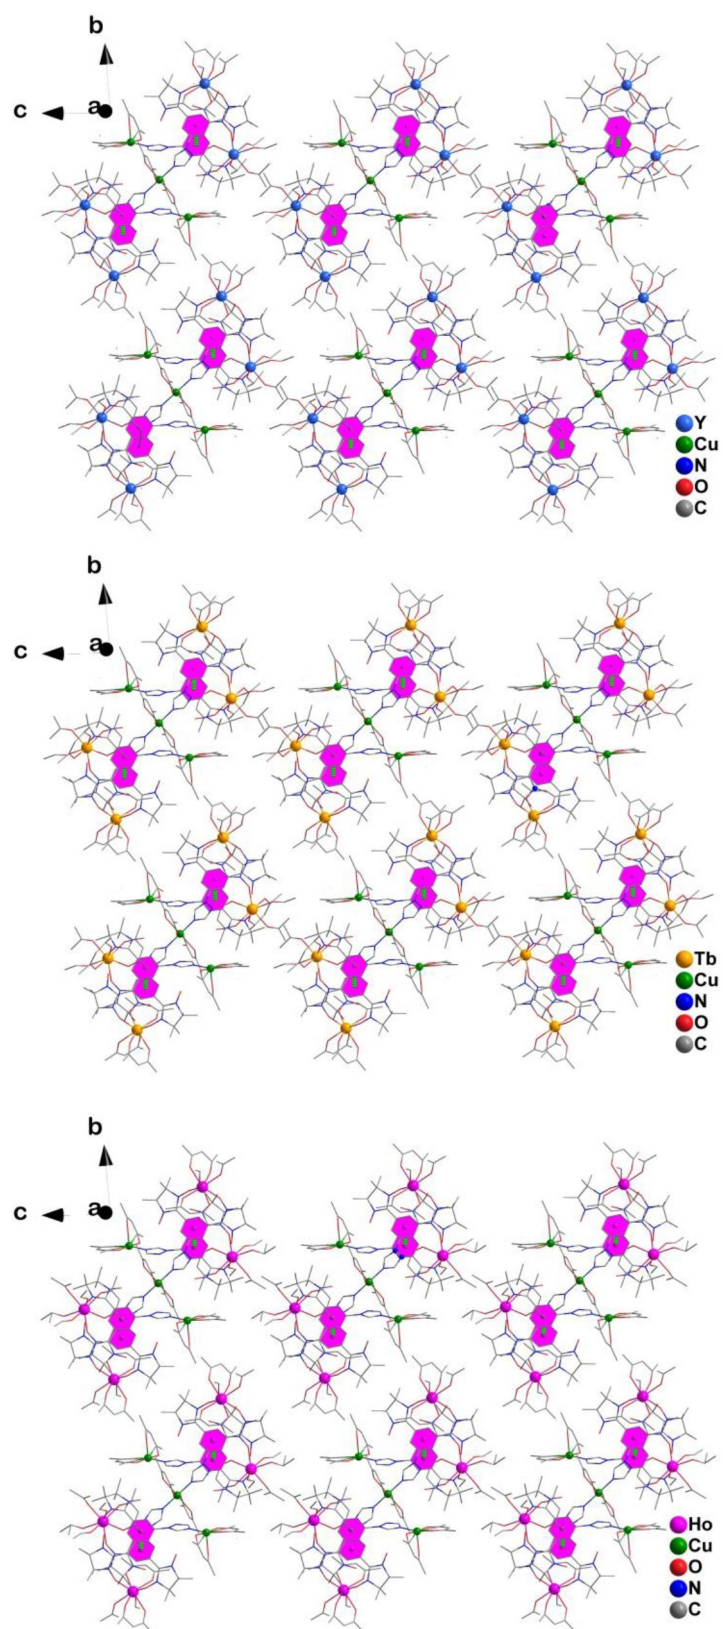

**Figure S4.** Packing arrangement for complexes **1** (top), **2** (middle), and **4** (bottom). Fluorine and hydrogen atoms are omitted for the sake of clarity.



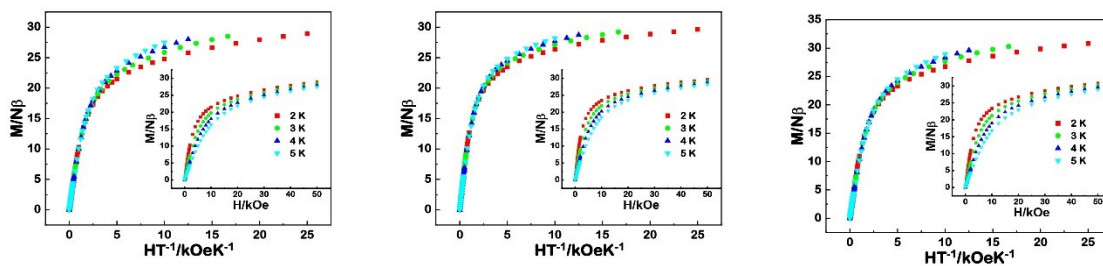

**Figure S5.** Field dependences of magnetization and plots of the reduced magnetization  $M$  vs.  $H/T$  (Insets) in the field range 0–50 kOe and at the temperature range of 2.0–5.0 K for complexes 2 (left), 3 (middle) and 4 (right).

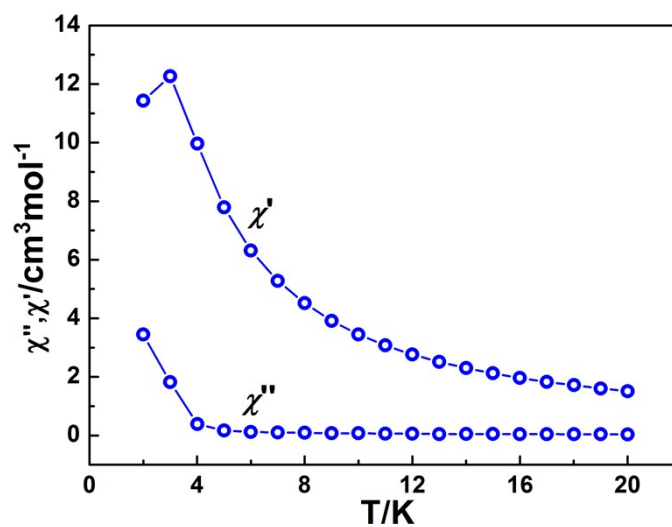

**Figure S6.** Temperature dependence of the in-phase and out-of-phase ac susceptibilities under zero dc field for **3**.

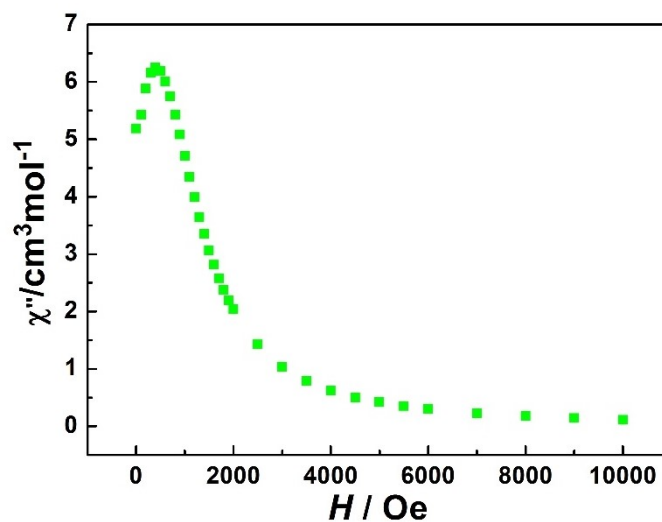

**Figure S7.** Field dependence of the out-of-phase ac susceptibilities for **3** under 2 K and a frequency of 997 Hz.

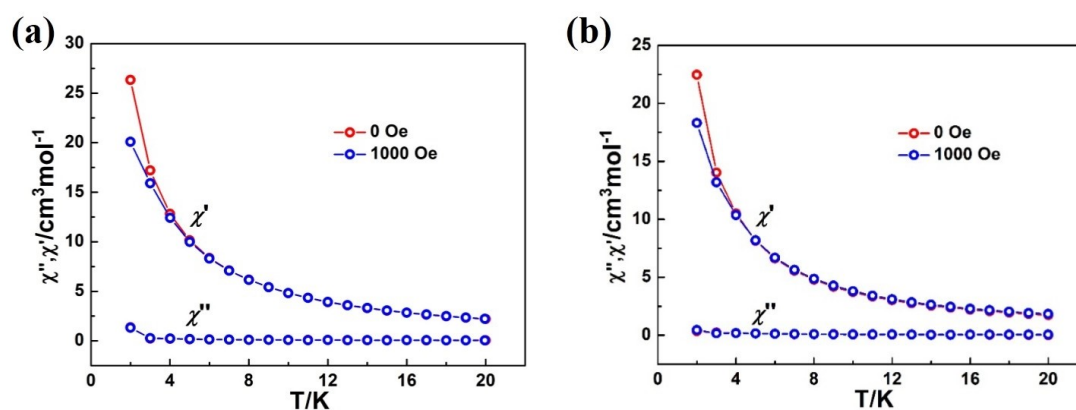

**Figure S8.** Temperature dependence of the in-phase and out-of-phase ac susceptibilities under zero dc field (red line) and 1000Oe dc field (blue line) for 2 and 4.

## References

1. K. Bernot, F. Pointillart, P. Rosa, M. Etienne, R. Sessoli and D. Gatteschi, *Chem. Commun.*, 2010, **46**, 6458-6460.
2. P. Jing, L. Xi, J. Lu, J. Han, X. Huang, C. Jin, J. Xie and L. Li, *Chem. Asian. J.*, 2021, **16**, 793-800.
3. L. Xi, J. Sun, K. Wang, J. Lu, P. Jing and L. Li, *Dalton. Trans.*, 2020, **49**, 1089-1096.
4. K. Wang, J. Sun, L. Xi, J. Lu, P. Jing and L. Li, *Dalton. Trans.*, 2019, **48**, 14383-14389.
